# Supplementary material for: Comparison of Saliva and Mid-Turbinate Swabs for Detection of COVID-19
Source: bioRxiv or medRxiv preprint supplement (doi:10.1101/2021.12.01.21267147), 2022-01-06
Supplement: Supplementary file [file media-1.pdf]

450 Supplementary Information for  
451 **Comparison of Saliva and Mid-Turbinate Swabs for Detection of COVID-19**

452  
453 Jianyu Lai, B.Med., M.P.H.<sup>a,b</sup>, Jennifer German, Ph.D.<sup>b</sup>, Filbert Hong, Ph.D.<sup>b</sup>, S.-H. Sheldon Tai,  
454 Ph.D.<sup>b</sup>, Kathleen M. McPhaul, Ph.D., M.P.H.<sup>b</sup>, Donald K. Milton, M.D., Dr.P.H.<sup>b</sup> for the  
455 University of Maryland StopCOVID Research Group\*

456  
457 <sup>a</sup> Department of Epidemiology and Biostatistics, University of Maryland School of Public  
458 Health, College Park, Maryland, USA

459 <sup>b</sup> Public Health Aerobiology and Biomarker Laboratory, Institute for Applied Environmental  
460 Health, University of Maryland School of Public Health, College Park, Maryland, USA

461

462 Supplemental Tables

463

464 Table S1. Association between detection frequency and sample types (MTS vs. saliva) <sup>a</sup>

465

| <i>Sample<br/>Positive</i> | <i>Sample Type</i> |        | <b><i>Total</i></b> |
|----------------------------|--------------------|--------|---------------------|
|                            | MTS                | Saliva |                     |
| No                         | 171                | 168    | 339                 |
| Yes                        | 29                 | 32     | 61                  |
| <b><i>Total</i></b>        | 200                | 200    | 400                 |

<sup>a</sup>  $\chi^2=0.077$ ,  $df=1$ ,  $p=0.781$

466

467 Table S2. MTS and saliva for positive participants (N=14)  
 468

|        | Number of subjects | Number of samples | Number of positive samples, N (%) | Ct value of positive samples, median (range) <sup>a</sup> | GM (95% CI) <sup>b</sup> of all samples                                   | GM (95% CI) <sup>c</sup> of positive samples                              |
|--------|--------------------|-------------------|-----------------------------------|-----------------------------------------------------------|---------------------------------------------------------------------------|---------------------------------------------------------------------------|
| MTS    | 13                 | 41                | 29 (71)                           | 20 (12, 33)                                               | 2.2 x10 <sup>5</sup><br>(1.0 x10 <sup>5</sup> ,<br>4.9 x10 <sup>5</sup> ) | 4.5 x10 <sup>6</sup><br>(3.5 x10 <sup>6</sup> ,<br>5.9 x10 <sup>6</sup> ) |
| Saliva | 12                 | 41                | 32 (78)                           | 27 (16, 35)                                               | 2.3 x10 <sup>3</sup><br>(1.2 x10 <sup>3</sup> ,<br>4.3 x10 <sup>3</sup> ) | 4.5 x10 <sup>5</sup><br>(4.0 x10 <sup>5</sup> ,<br>5.0 x10 <sup>5</sup> ) |

469 <sup>a</sup>. A positive sample was defined as having Ct < 40 in PCR detection for at least two out of three  
 470 SARS-CoV-2 genes (N, S, ORF1ab)

471 <sup>b</sup>. GM = geometric mean. The GMs were computed, accounting for samples below the LOD,  
 472 using a linear mixed-effects model for censored responses (R Project LMEC package) using data  
 473 for all samples of each sample type with nested random effects of samples within study  
 474 participant.

475 <sup>c</sup>. GM were calculated using data from only positive samples of each sample type with nested  
 476 random effects of samples within study participant.

477 Table S3a. Viral RNA detection in paired saliva and MTS samples from participants with one or  
 478 more positive samples (N=14) <sup>a</sup>

| <i>Saliva Positive</i> | <i>MTS Positive</i> |     | <b><i>Total</i></b> |
|------------------------|---------------------|-----|---------------------|
|                        | No                  | Yes |                     |
| No                     | 6                   | 3   | 9                   |
| Yes                    | 6                   | 26  | 32                  |
| <b><i>Total</i></b>    | 12                  | 29  | 41                  |

479 <sup>a</sup> Cohen's Kappa between the two sample types was calculated as  $\kappa=0.43$

480

481

482 Table S3b. Viral RNA detection in paired saliva and MTS samples from symptomatic  
 483 participants with one or more positive samples (N=13) <sup>a</sup>

484

| <i>Saliva Positive</i> | <i>MTS Positive</i> |     | <b><i>Total</i></b> |
|------------------------|---------------------|-----|---------------------|
|                        | No                  | Yes |                     |
| No                     | 6                   | 3   | 9                   |
| Yes                    | 6                   | 25  | 31                  |
| <b><i>Total</i></b>    | 12                  | 28  | 40                  |

485 <sup>a</sup> Cohen's Kappa between the two sample types was calculated as  $\kappa=0.42$

486

487 Table S4. Saliva and MTS testing results for the asymptomatic positive participant (N=1)

|               | <b>Ngene Ct</b> | <b>Orflab Ct</b> | <b>Sgene Ct</b> | <b>Average Ct</b> |
|---------------|-----------------|------------------|-----------------|-------------------|
| <b>MTS</b>    | 26.7            | 25.2             | 25.6            | 25.8              |
| <b>Saliva</b> | 33.4            | 36.3             | 34.5            | 34.7              |

488

489 Supplemental Figures  
490

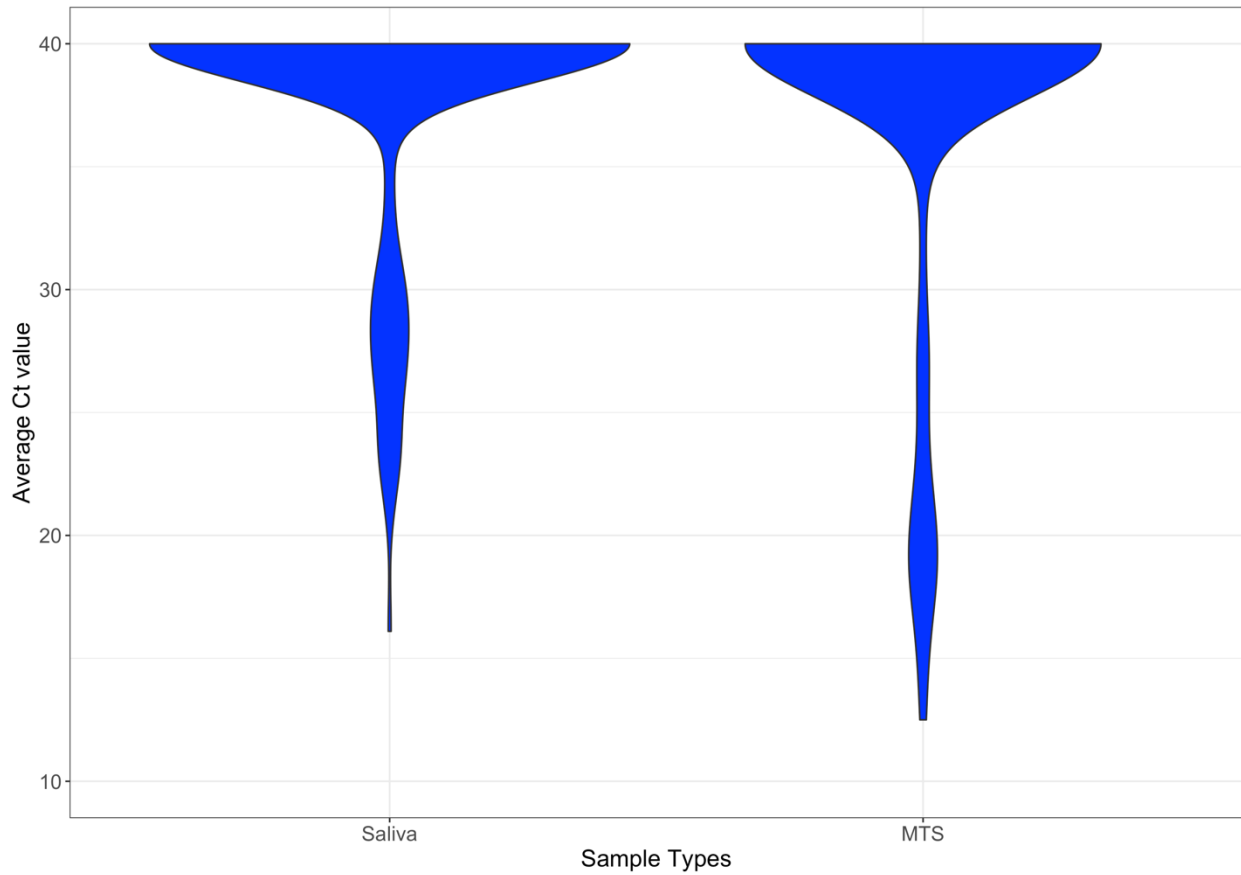

491  
492 Figure S1. Distribution of Ct values by sample types among 58 participants and 400 samples.  
493

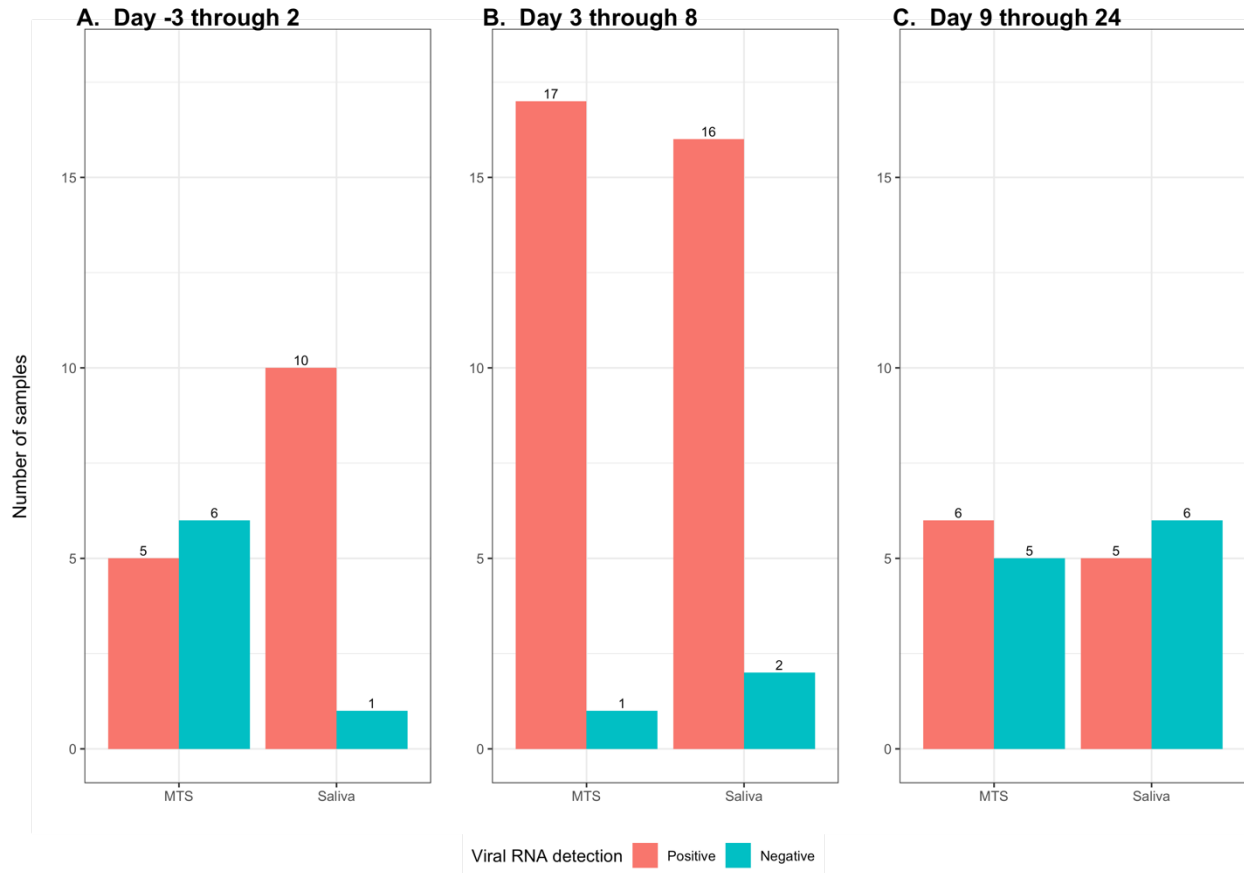

494

495 Figure S2. Distribution of samples from 13 symptomatic positive cases by days since symptom  
 496 onset. A) Days -3 through 2, B) Days 3 through 8, C) Days 8 through 24.
